# Supplementary material for: Field-scale soil moisture bridges the spatial-scale gap between drought monitoring and agricultural yields
Source: Copernicus journal article supplement (doi:10.5194/hess-2020-364), 2020-07-24
Supplement: Supplementary file 1 [file hess-2020-364-supplement.pdf]

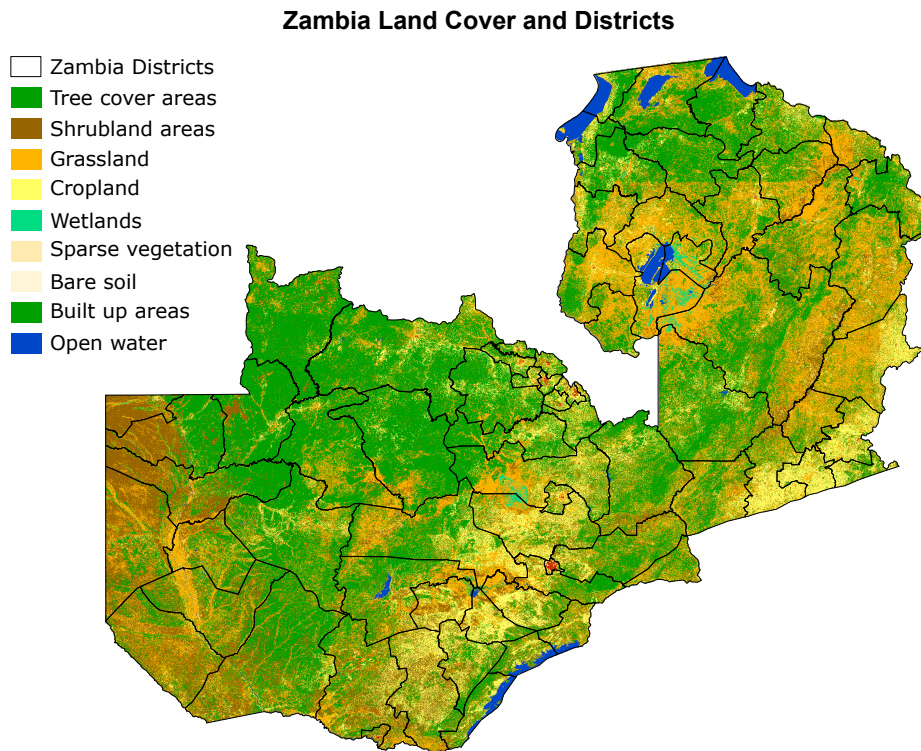

**Figure S1.** Zambia districts and the land cover distribution at 20-m resolution from ESA-CCI (2016).

**Table S1.** Implementation of the Recursive Feature Elimination approach.

| Recursive Feature Elimination                                                                                                                                                                                                                                                                                                                                                                                                                                                                                                                                                                                                                                                                                                                                                                                                                                                                                                                                                                                                                                                                                                                                                      |
|------------------------------------------------------------------------------------------------------------------------------------------------------------------------------------------------------------------------------------------------------------------------------------------------------------------------------------------------------------------------------------------------------------------------------------------------------------------------------------------------------------------------------------------------------------------------------------------------------------------------------------------------------------------------------------------------------------------------------------------------------------------------------------------------------------------------------------------------------------------------------------------------------------------------------------------------------------------------------------------------------------------------------------------------------------------------------------------------------------------------------------------------------------------------------------|
| <ol style="list-style-type: none"> <li>1. Train the RF model using the entire training predictor set;</li> <li>2. Calculate <math>R^2</math> performance on the testing sample and set it as the baseline <math>R^2</math>;</li> <li>3. Calculate the importance of each predictor by: <ul style="list-style-type: none"> <li>– Re-training the RF model without the selected predictor;</li> <li>– Calculate the new <math>R^2</math> performance;</li> <li>– Calculated the change in performance as <math>\text{delta } R^2 = \text{baseline } R^2 - \text{new } R^2</math>. The higher the positive change in <math>\text{delta } R^2</math> the more important is the predictor.</li> </ul> </li> <li>4. Rank the predictors based on their importance (higher <math>\text{delta } R^2</math> to lowest <math>\text{delta } R^2</math>);</li> <li>5. Remove the least important predictor (lowest <math>\text{delta } R^2</math>), and update the predictor set;</li> <li>6. Repeat step 1–5 until stop when the lowest <math>\text{delta } R^2</math> is <math>&lt; 0.001</math>;</li> <li>7. Compute the importance rank (step 3–4) for the final predictor set.</li> </ol> |

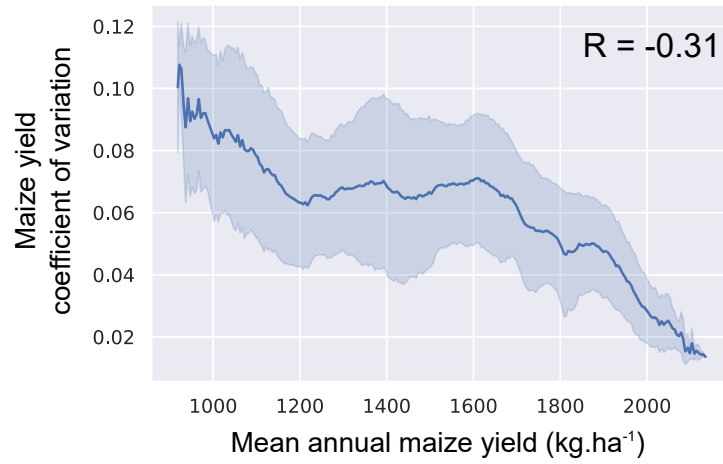

**Figure S2.** Relationship between field-scale mean annual maize yields and coefficient of variation, as estimated by the random forest model. We observe an inverse relationship (Pearson correlation of -0.31) that shows that locations of lower mean annual yields tend to have higher variation on their inter-annual yields, while locations of consistent high yield productivity tend to show minimal variation.

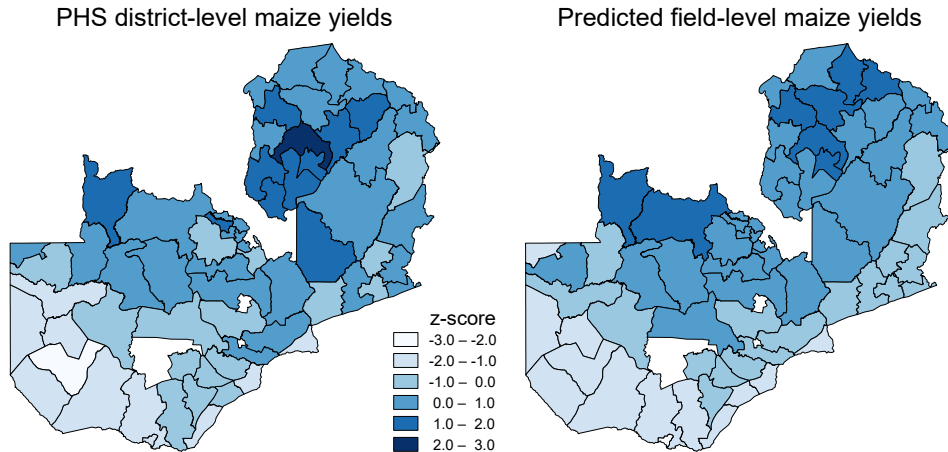

**Figure S3.** The z-score of the field-scale maize yields aggregate to the district-level in comparison with the z-score from the PHS district-level data.

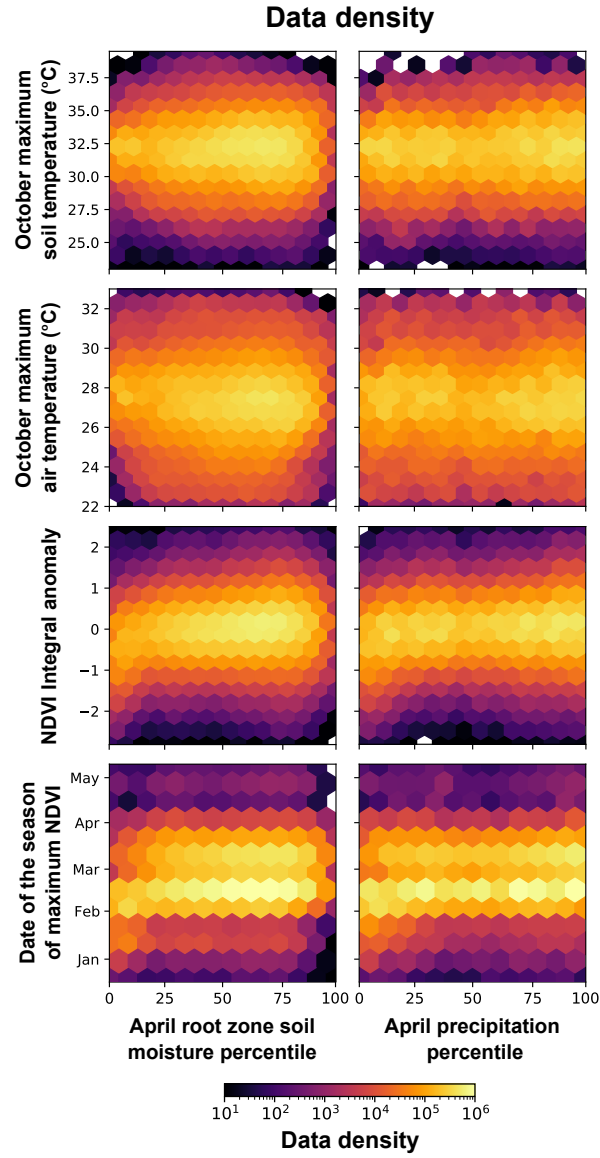

**Figure S4.** The number of grid cells used to calculate the mean yield anomaly values of each hexbin in Figure 8

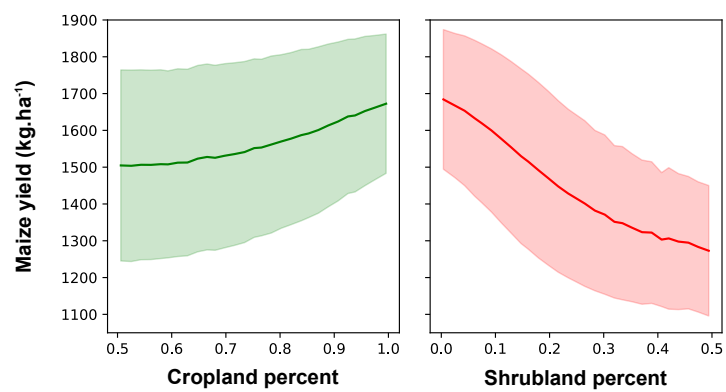

**Figure S5.** Mean field-scale maize yield for different cropland and shrubland percent. Shrubland percent characterized how much the agricultural area is fragmented, and it showed to be a strong predictor (inversely correlated) to maize yield. The shade shows the standard deviation.
